# Supplementary material for: Language extinction triggers the loss of unique medicinal knowledge
Source: PubMed Central journal article supplement — Proc Natl Acad Sci U S A. 2021 Jun 8;118(24):e2103683118. doi: 10.1073/pnas.2103683118 (PMC8214696; doi:10.1073/pnas.2103683118), 2021-06-08
Supplement: pnas.2103683118.sapp.pdf [file pnas.2103683118.sapp.pdf]

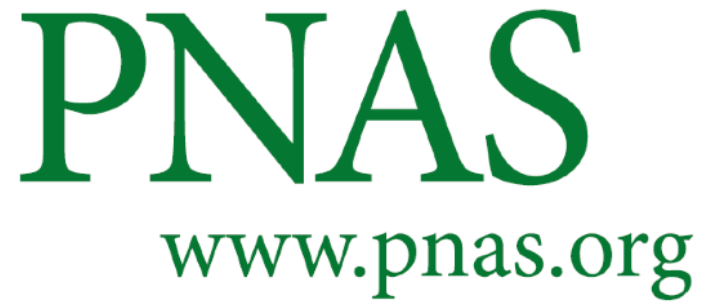

## **Supplementary Information for**

### **Language extinction triggers the loss of unique medicinal knowledge**

**Rodrigo Cámara-Leret and Jordi Bascompte**

**Rodrigo Cámara-Leret.**

**E-mail: [rodrigo.camaraleret@ieu.uzh.ch](mailto:rodrigo.camaraleret@ieu.uzh.ch)**

#### **This PDF file includes:**

Tables S1 to S3

**Table S1. Phylogenetic clustering (measured using Pagel's  $\lambda$ ) of unique knowledge along the language and plant phylogenies of North America, Northwest Amazonia, and New Guinea. Statistically significant results: \*\*\*, P-value < 0.001.**

| Region             | Languages | Plants   |
|--------------------|-----------|----------|
| North America      | 0.31      | 0.21***  |
| Northwest Amazonia | 6.61e-05  | 6.61e-05 |
| New Guinea         | 6.61e-05  | 0.02     |

**Table S2. Names and Glottolog codes of the studied languages of North America, northwest Amazonia, and New Guinea.**

| Language name              | Glottolog code |
|----------------------------|----------------|
| NORTH AMERICA              |                |
| Alabama                    | alab1237       |
| Aleut                      | aleu1260       |
| Algonquin                  | algo1255       |
| Arapaho                    | arap1274       |
| Arikara                    | arik1262       |
| Atikamekw                  | atik1240       |
| Atsugewi                   | atsu1245       |
| Bella Coola                | bell1243       |
| Cahuilla                   | cahu1264       |
| Central Carrier            | carr1249       |
| Catawba                    | cata1286       |
| Central Alaskan Yupik      | cent2127       |
| Cherokee                   | cher1273       |
| Cheyenne                   | chey1247       |
| Chickasaw                  | chic1270       |
| Chippewa                   | chip1241       |
| Choctaw                    | choc1276       |
| Clallam                    | clal1241       |
| Cocopa                     | coco1261       |
| Comanche                   | coma1245       |
| Cowlitz                    | cowl1242       |
| Creek                      | cree1270       |
| Crow                       | crow1244       |
| Dakota                     | dako1258       |
| Ditidaht                   | diti1235       |
| Eastern Keres              | east1472       |
| Eastern Canadian Inuktitut | east2534       |
| Eastern Abenaki            | east2544       |
| Eastern Pomo               | east2545       |
| Gitksan                    | gitx1241       |
| Gros Ventre                | gros1243       |
| Haisla                     | hais1244       |
| Halkomelem                 | halk1245       |
| Havasupai-Walapai-Yavapai  | hava1248       |
| Hawaiian                   | hawa1245       |
| Heiltsuk-Oowekyala         | heil1246       |
| Ho-Chunk                   | hoch1243       |
| Hopi                       | hopi1249       |
| Iowa-Oto                   | iowa1245       |
| Towa                       | jeme1245       |
| Kalispel-Pend d'Oreille    | kali1308       |
| Karok                      | karo1304       |
| Kashaya                    | kash1280       |

Table S2. (continued)

| Language name                   | Glottolog code |
|---------------------------------|----------------|
| NORTH AMERICA                   |                |
| Kawaiisu                        | kawa1283       |
| Kiowa                           | kiow1266       |
| Klamath-Modoc                   | klam1254       |
| Koasati                         | koas1236       |
| Koyukon                         | koyu1237       |
| Tipai                           | kumi1248       |
| Kutenai                         | kute1249       |
| Kwak'wala                       | kwak1269       |
| Lakota                          | lako1247       |
| Luiseno-Juaneño                 | luis1253       |
| Northern Lushootseed            | lush1252       |
| Makah                           | maka1318       |
| Malecite-Passamaquoddy          | male1292       |
| Mandan                          | mand1446       |
| Maricopa                        | mari1440       |
| Menominee                       | meno1252       |
| Mescalero-Chiricahua Apache     | mesc1238       |
| Meskwaki                        | mesk1242       |
| Mi'kmaq                         | mikm1235       |
| Montagnais                      | mont1268       |
| Munsee                          | muns1251       |
| Nanticoke                       | nant1249       |
| Natchez                         | natc1249       |
| Navajo                          | nava1243       |
| Nez Perce                       | nezp1238       |
| Nisenan                         | nise1244       |
| North Alaskan Inupiatun         | nort2943       |
| Northwest Maidu                 | nort2951       |
| Northern Paiute                 | nort2954       |
| Northern Pomo                   | nort2966       |
| Northeastern Russian River Pomo | nort2967       |
| Northern Ohlone                 | nort2969       |
| Southern-Coastal Tsimshian      | nucl1649       |
| Nuu-chah-nulth                  | nuuc1236       |
| Obispeño                        | obis1242       |
| Okanagan                        | okan1243       |
| Omaha-Ponca                     | omah1247       |
| Pawnee                          | pawn1254       |
| Pima Bajo                       | pima1248       |
| Potawatomi                      | pota1247       |
| Powhatan                        | powh1243       |
| Quechan                         | quec1382       |
| Quileute                        | quil1240       |
| Quinault                        | quin1251       |
| Seri                            | seri1257       |

**Table S2.** (continued)

| Language name               | Glottolog code |
|-----------------------------|----------------|
| NORTH AMERICA               |                |
| Shasta                      | shas1239       |
| Shoshoni                    | shos1248       |
| Shuswap                     | shus1248       |
| Siksika                     | siks1238       |
| Southern Tiwa               | sout2961       |
| Southern Puget Sound Salish | sout2965       |
| Southern Sierra Miwok       | sout2985       |
| Northern Straits Salish     | stra1244       |
| Tanaina                     | tana1289       |
| Rio Grande Tewa             | tewa1260       |
| Thompson                    | thom1243       |
| Tlingit                     | tlin1245       |
| Tohono O'odham              | toho1245       |
| Tolowa-Chetco               | tolo1259       |
| Tubatulabal                 | tuba1278       |
| Twana                       | twan1247       |
| Umatilla                    | umat1237       |
| Unami                       | unam1242       |
| Upper Tanana                | uppe1437       |
| Upper Chehalis              | uppe1439       |
| Ute-Southern Paiute         | utes1238       |
| Washo                       | wash1253       |
| Western Apache              | west2615       |
| Western Keres               | west2632       |
| Woods Cree                  | wood1236       |
| Huron-Wyandot               | wyan1247       |
| Yana                        | yana1271       |
| Northern Yokuts             | yoku1256       |
| Yuki                        | yuki1243       |
| Yurok                       | yuro1248       |
| Zuni                        | zuni1245       |

Table S2. (continued)

| Language name        | Glottolog code |
|----------------------|----------------|
| NORTHWEST AMAZONIA   |                |
| Achuar-Shiwiar       | achu1248       |
| Andoque              | ando1256       |
| Asháninka            | asha1243       |
| Barasana-Eduria      | bara1380       |
| Bora                 | bora1263       |
| Cabiyari             | cabi1241       |
| Kakua                | cacu1241       |
| Camsá                | cams1241       |
| Candoshi-Shapra      | cand1248       |
| Carapana             | cara1272       |
| Carijona             | cari1279       |
| Cocama-Cocamilla     | coca1259       |
| Cofán                | cofa1242       |
| Cubeo                | cube1242       |
| Curripaco            | curr1243       |
| Deni                 | deni1241       |
| Desano               | desa1247       |
| Kotiria              | guan1269       |
| Huambisa             | huam1247       |
| Inga                 | inga1252       |
| Kulina Pano          | kuli1255       |
| Macuna               | macu1260       |
| Murui Huitoto        | mur1274        |
| Puinave              | puin1248       |
| San Martín Quechua   | sanm1289       |
| Secoya               | seco1241       |
| Sharanahua           | shar1245       |
| Shipibo-Conibo       | ship1254       |
| Shuar                | shua1257       |
| Siona-Tetete         | sion1247       |
| Tanimuca-Retuarã     | tani1257       |
| Tena Lowland Quichua | tena1240       |
| Ticuna               | ticu1245       |
| Tucano               | tuca1252       |
| Waorani              | waor1240       |
| Yanomámi             | yano1262       |
| Yucuna               | yucu1253       |

Table S2. (continued)

| Language name            | Glottolog code |
|--------------------------|----------------|
| NEW GUINEA               |                |
| Amanab                   | aman1265       |
| Ambai                    | amba1265       |
| Ambulas                  | ambu1247       |
| Angguruk Yali            | angg1239       |
| Dombano                  | aran1237       |
| Barapasi                 | bara1375       |
| Benabena                 | bena1264       |
| Biak                     | biak1248       |
| Binandere                | bina1277       |
| Buruwai                  | buru1308       |
| Casuarina Coast Asmat    | casu1237       |
| Damal                    | dama1272       |
| Eipomek                  | eipo1242       |
| Ekari                    | ekar1243       |
| Enga                     | enga1252       |
| Faiwol                   | faiw1243       |
| Fore                     | fore1270       |
| Fuyug                    | fuyu1242       |
| Gimi (Eastern Highlands) | gimi1243       |
| Grass Koiari             | gras1249       |
| Hamtai                   | hamt1247       |
| Hatam                    | hata1243       |
| Huli                     | huli1244       |
| Iatmul                   | iatm1242       |
| Iha                      | ihaa1241       |
| Imbongu                  | imbo1238       |
| Irarutu                  | irar1238       |
| Kais                     | kais1235       |
| Kalam                    | kala1397       |
| Kamoro                   | kamo1255       |
| Kaulong                  | kaul1240       |
| Ketengban                | kete1254       |
| Kilivila                 | kili1267       |
| Kosarek Yale             | kosa1249       |
| Kuanua                   | kuan1248       |
| Kuman                    | kuma1280       |
| Kwoma                    | kwom1262       |

Table S2. (continued)

| Language name           | Glottolog code |
|-------------------------|----------------|
| NEW GUINEA              |                |
| Lower Grand Valley Dani | lowe1415       |
| Maia                    | maia1254       |
| Maybrat-Karon           | maib1239       |
| Mangga Buang            | mang1404       |
| Sougb                   | mani1235       |
| Mekeo                   | meke1243       |
| Melpa                   | melp1238       |
| Mengen                  | meng1267       |
| Meyah                   | meya1236       |
| Mian                    | mian1256       |
| Moi (Indonesia)         | moii1235       |
| Molima                  | moli1248       |
| Moni                    | moni1261       |
| Marori                  | moro1289       |
| Motu                    | motu1246       |
| Nakanai                 | naka1262       |
| Ngkontar Ngkolmpu       | ngka1235       |
| Nobonob                 | nobo1238       |
| North Tairora           | nort2920       |
| Yawa                    | nucl1454       |
| Kwerba                  | nucl1595       |
| Marind                  | nucl1622       |
| Oksapmin                | oksa1245       |
| Ormu                    | ormu1248       |
| Pare                    | pare1271       |
| Pinai-Hagahai           | pina1252       |
| Serui-Laut              | seru1244       |
| Sinaugoro               | sina1266       |
| Sinasina                | sina1271       |
| Suabo                   | suab1238       |
| Suau                    | suau1242       |
| Tabla                   | tabl1243       |
| Tauade                  | taua1242       |
| Telefol                 | tele1256       |
| Tifal                   | tifa1245       |
| Waima                   | waim1251       |
| Wandamen                | wand1267       |
| Wano                    | wano1243       |
| Waritai                 | wari1264       |
| Western Dani            | west2594       |
| Yei                     | yeii1239       |
| Yopno                   | yopn1238       |
| Zimakani                | zima1244       |



**Table S3. The percentage of unique knowledge associated to threatened and non-threatened languages and plants in North America ( $n = 7,565$  medicinal services); Northwest Amazonia ( $n = 773$  medicinal services); and New Guinea ( $n = 873$  medicinal services). Language threat follows the classification in Glottolog. Plant threat follows the IUCN Red List of Threatened species.**

|                       | North America languages |            | Northwest Amazonia languages |            | New Guinea languages |            |
|-----------------------|-------------------------|------------|------------------------------|------------|----------------------|------------|
|                       | Not threatened          | Threatened | Not threatened               | Threatened | Not threatened       | Threatened |
| Threatened Plants     | 0                       | <1         | 0                            | <1         | 1                    | 1          |
| Not threatened plants | 2                       | 21         | 0                            | 30         | 21                   | 13         |
| Unknown threat plants | 12                      | 64         | 0                            | 69         | 47                   | 17         |
